# Supplementary material
Source: PubMed Central journal article supplement (PMC4746368)
Supplement: mmc1.pdf [file mmc1.pdf]

The American Journal of Human Genetics

Supplemental Data

**TMEM199 Deficiency Is a Disorder of Golgi Homeostasis  
Characterized by Elevated Aminotransferases, Alkaline  
Phosphatase, and Cholesterol and Abnormal Glycosylation**

Jos C. Jansen, Sharita Timal, Monique van Scherpenzeel, Helen Michelakakis, Dorothee Vicogne, Angel Ashikov, Marina Moraitou, Alexander Hoischen, Karin Huijben, Gerry Steenbergen, Marjolein A.W. van den Boogert, Francesco Porta, Pier Luigi Calvo, Mersyni Mavrikou, Giovanna Cenacchi, Geert van den Bogaart, Jody Salomon, Adriaan G. Holleboom, Richard J. Rodenburg, Joost P.H. Drenth, Martijn A. Huynen, Ron A. Wevers, Eva Morava, François Foulquier, Joris A. Veltman, and Dirk J. Lefeber

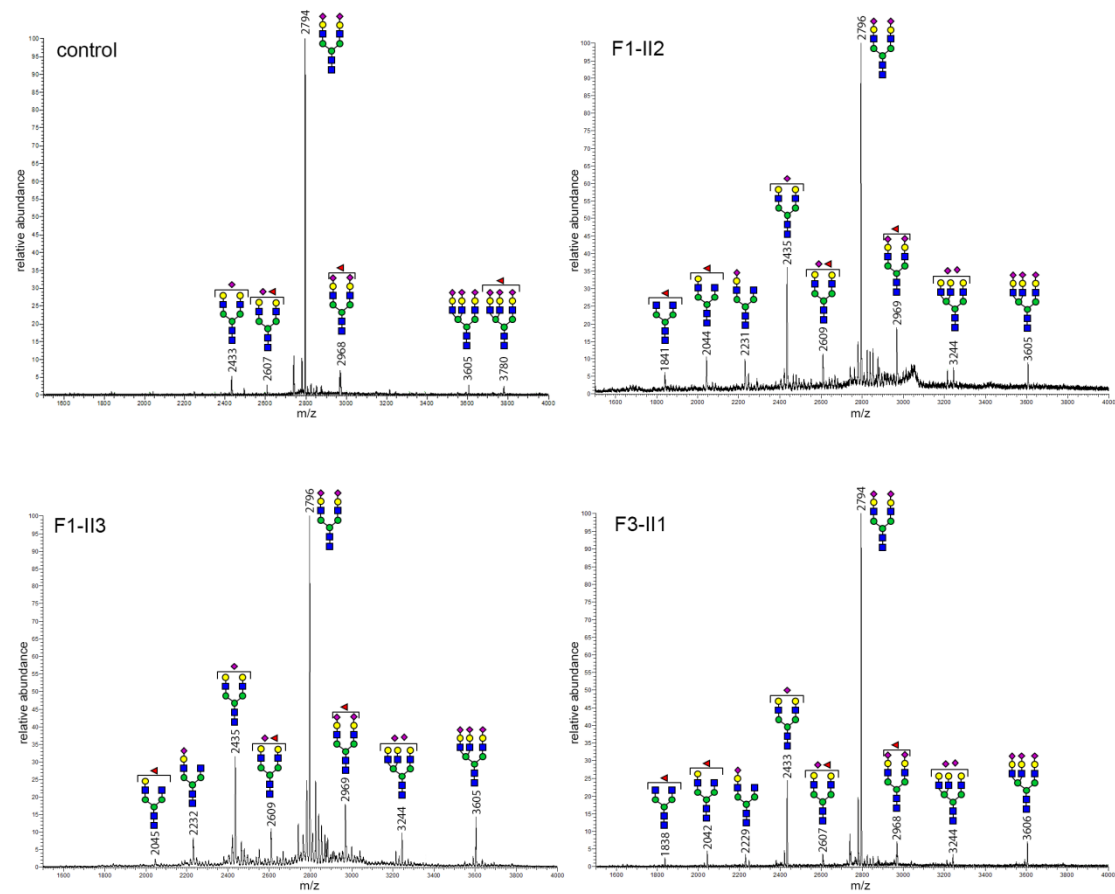

**Figure S1 MALDI mass spectrometry profiles of total serum N-glycans of a healthy control and TMEM199 deficient individuals F1-II2, F1-II3 and F3-II1. An increase in hypoglycosylated glycans can be seen for all affected individuals when compared to a healthy control. Most notably the glycans with theoretical masses of 2433 m/z and 2228 m/z are increased, indicating loss of one sialic acid (2433 m/z) or one sialic acid plus one galactose (2228m/z).**

| Table S1 quantifications of transferrin Isoelectric focusing |            |             |             |             |             |             |             |             |
|--------------------------------------------------------------|------------|-------------|-------------|-------------|-------------|-------------|-------------|-------------|
|                                                              |            | 0-sialo (%) | 1-sialo (%) | 2-sialo (%) | 3-sialo (%) | 4-sialo (%) | 5-sialo (%) | 6-sialo (%) |
| Control range (n=60)                                         |            | 0.0-3.2     | 0.0-5.0     | 3.3 -7.6    | 4.9 -10.6   | 47.3-62.7   | 18.7-31.5   | 3.2-7.8     |
| Family                                                       | individual |             |             |             |             |             |             |             |
| F1                                                           | II2        | 2.85        | 7.07 ↑      | 16.46 ↑     | 24.38 ↑     | 33.58 ↓     | 13.49 ↓     | 2.17 ↓      |
|                                                              | II3        | 1.28        | 4.53        | 15.60 ↑     | 27.26 ↑     | 34.64 ↓     | 13.77 ↓     | 2.92 ↓      |
| F2                                                           | II2        | 1.31        | 3.51        | 11.18 ↑     | 21.95 ↑     | 49.53 ↓     | 10.54 ↓     | 1.98 ↓      |
| F3                                                           | II1        | 1.4         | 3.9         | 13.6 ↑      | 27.6 ↑      | 38.7 ↓      | 12.4 ↓      | 2.5         |

| Table S2 quantifications of Apolipoprotein C-III Isoelectric focusing |            |                 |             |             |             |
|-----------------------------------------------------------------------|------------|-----------------|-------------|-------------|-------------|
|                                                                       |            |                 | 0-sialo (%) | 1-sialo (%) | 2-sialo (%) |
| Control range                                                         | Age 0-1    |                 | 0.2-4.5     | 42.7-69.8   | 26.2-56.7   |
|                                                                       | Age 1-18   |                 | 1.4-9.5     | 48.5-75.2   | 21.0-45.8   |
|                                                                       | Age >18    |                 | 1.8-7.6     | 47.4-73.6   | 20.2-46.5   |
|                                                                       |            |                 |             |             |             |
| Family                                                                | individual | Age at analysis |             |             |             |
| F1                                                                    | II2        | 17              | 5.1         | 83.9 ↑      | 11.0 ↓      |
|                                                                       | II3        | 9               | 5.9         | 81.7 ↑      | 12.6 ↓      |
| F2                                                                    | II2        | >18             | 7.2         | 65.5        | 27.3        |
| F3                                                                    | II1        | 12              | 3.5         | 85.3 ↑      | 11.2 ↓      |
|                                                                       |            |                 |             |             |             |

**Table S3 Glycan structures (peak numbers associated with Figure 3C)**

| Peak | Structure                                                                          | Predicted mass (amu) |
|------|------------------------------------------------------------------------------------|----------------------|
| 1    | 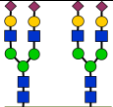  | 79555                |
| 2    |   | 79265                |
| 3    |   | 79104                |
| 4    |   | 78973                |
| 5    |   | 78811                |
| 6    |  | 78649                |
